# Supplementary material for: The Use of Professional Development to Enhance Education of Students with Autism: A Systematic Review
Source: MDPI journal article supplement (doi:10.3390/educsci13090966), 2023-09-21
Supplement: s1 [file s1]

# Supplementary material

Quality Assessment based on Mixed Methods Appraisal Tool (MMAT), version 2018.

| Category of study designs           | Methodological quality criteria                                                                    |                            |                |                                                                                                                                                                                                                                                                                                                                                                                                                                                                                                                                                                                                              |
|-------------------------------------|----------------------------------------------------------------------------------------------------|----------------------------|----------------|--------------------------------------------------------------------------------------------------------------------------------------------------------------------------------------------------------------------------------------------------------------------------------------------------------------------------------------------------------------------------------------------------------------------------------------------------------------------------------------------------------------------------------------------------------------------------------------------------------------|
|                                     |                                                                                                    | Yes                        | No             | Articles                                                                                                                                                                                                                                                                                                                                                                                                                                                                                                                                                                                                     |
| Screening questions (for all types) | S1. Are there clear research questions?                                                            | x <sup>p</sup>             |                | <sup>a</sup> Able et.al. (2015),                                                                                                                                                                                                                                                                                                                                                                                                                                                                                                                                                                             |
|                                     | S2. Do the collected data allow to address the research questions?                                 | x <sup>p</sup>             |                | <sup>b</sup> Asaro-Saddler & Bak (2012)<br><sup>c</sup> Bertuccio et.al (2019),<br><sup>d</sup> Bisika et.al. (2017).<br><sup>e</sup> Finlay et al. (2022),<br><sup>f</sup> Ho et al. (2018),<br><sup>g</sup> Johnson et al. (2021),<br><sup>h</sup> Kucharczyk et al. (2015),<br><sup>i</sup> Macdonald et al. (2021),<br><sup>j</sup> Mintz et al. (2021),<br><sup>k</sup> Probst, & Walker (2017),<br><sup>l</sup> Sam et al. (2021),<br><sup>m</sup> Strieker et al. (2012),<br><sup>n</sup> Tekin-Iftar et al. (2017),<br><sup>o</sup> Williams et al. (2021)<br><br><sup>p</sup> All included articles |
| 1. Qualitative                      | 1.1. Is the qualitative approach appropriate to answer the research question?                      | x <sup>a, h, j, o, i</sup> |                | <sup>a</sup> Able et.al. (2015),                                                                                                                                                                                                                                                                                                                                                                                                                                                                                                                                                                             |
|                                     | 1.2. Are the qualitative data collection methods adequate to address the research question?        | x <sup>a, h, j, o, i</sup> |                | <sup>b</sup> Kucharczyk et al. (2015),<br><sup>j</sup> Mintz et al. (2021),<br><sup>o</sup> Williams et al. (2021)                                                                                                                                                                                                                                                                                                                                                                                                                                                                                           |
|                                     | 1.3. Are the findings adequately derived from the data?                                            | x <sup>a, h, o, i</sup>    | x <sup>j</sup> | <sup>i</sup> Macdonald et al. (2021),                                                                                                                                                                                                                                                                                                                                                                                                                                                                                                                                                                        |
|                                     | 1.4. Is the interpretation of results sufficiently substantiated by data?                          | x <sup>a, h, o, i</sup>    | x <sup>j</sup> |                                                                                                                                                                                                                                                                                                                                                                                                                                                                                                                                                                                                              |
|                                     | 1.5. Is there coherence between qualitative data sources, collection, analysis and interpretation? | x <sup>a, h, o, i</sup>    | x <sup>j</sup> |                                                                                                                                                                                                                                                                                                                                                                                                                                                                                                                                                                                                              |
| 2. Quantitative randomized          | 2.1. Is randomization appropriately performed?                                                     | x <sup>l</sup>             | x <sup>g</sup> | <sup>g</sup> Johnson et al. (2021),<br><sup>l</sup> Sam et al. (2021),                                                                                                                                                                                                                                                                                                                                                                                                                                                                                                                                       |
|                                     | 2.2. Are the groups comparable at baseline?                                                        | x <sup>l</sup>             | x <sup>g</sup> |                                                                                                                                                                                                                                                                                                                                                                                                                                                                                                                                                                                                              |

|                                |                                                                                                                         |                        |                   |                                                                                                                                                                                                |
|--------------------------------|-------------------------------------------------------------------------------------------------------------------------|------------------------|-------------------|------------------------------------------------------------------------------------------------------------------------------------------------------------------------------------------------|
| controlled trials              | 2.3. Are there complete outcome data?                                                                                   | X <sup>l</sup>         | X <sup>g</sup>    |                                                                                                                                                                                                |
|                                | 2.4. Are outcome assessors blinded to the intervention provided?                                                        |                        | X <sup>g, l</sup> |                                                                                                                                                                                                |
|                                | 2.5 Did the participants adhere to the assigned intervention?                                                           | X <sup>g, l</sup>      |                   |                                                                                                                                                                                                |
| 3. Quantitative non-randomized | 3.1. Are the participants representative of the target population?                                                      | X <sup>c,n</sup>       | X <sup>k</sup>    | <sup>c</sup> Bertuccio et.al (2019)<br><sup>k</sup> Probst, & Walker (2017)<br><sup>n</sup> Tekin-Iftar et al. (2017),                                                                         |
|                                | 3.2. Are measurements appropriate regarding both the outcome and intervention (or exposure)?                            | X <sup>c,k,n</sup>     |                   |                                                                                                                                                                                                |
|                                | 3.3. Are there complete outcome data?                                                                                   | X <sup>c, k,n</sup>    |                   |                                                                                                                                                                                                |
|                                | 3.4. Are the confounders accounted for in the design and analysis?                                                      | X <sup>c,n</sup>       | X <sup>k</sup>    |                                                                                                                                                                                                |
|                                | 3.5. During the study period, is the intervention administered (or exposure occurred) as intended?                      | X <sup>c, k,n</sup>    |                   |                                                                                                                                                                                                |
| 4. Quantitative descriptive    | 4.1. Is the sampling strategy relevant to address the research question?                                                | X <sup>b,d,e,f,m</sup> |                   | <sup>b</sup> Asaro-Saddler & Bak (2012)<br><sup>d</sup> Bitsika et.al. (2017),<br><sup>e</sup> Finlay et al. (2022),<br><sup>f</sup> Ho et al. (2018),<br><sup>m</sup> Stricker et al. (2012), |
|                                | 4.2. Is the sample representative of the target population?                                                             | X <sup>b,d,e,f,m</sup> |                   |                                                                                                                                                                                                |
|                                | 4.3. Are the measurements appropriate?                                                                                  | X <sup>b,d,e,f,m</sup> |                   |                                                                                                                                                                                                |
|                                | 4.4. Is the risk of nonresponse bias low?                                                                               | X <sup>b,d,e,f</sup>   | X <sup>m</sup>    |                                                                                                                                                                                                |
|                                | 4.5. Is the statistical analysis appropriate to answer the research question?                                           | X <sup>b,d ,e,m</sup>  | X <sup>f</sup>    |                                                                                                                                                                                                |
| 5. Mixed methods               | 5.1. Is there an adequate rationale for using a mixed methods design to address the research question?                  |                        |                   |                                                                                                                                                                                                |
|                                | 5.2. Are the different components of the study effectively integrated to answer the research question?                  |                        |                   |                                                                                                                                                                                                |
|                                | 5.3. Are the outputs of the integration of qualitative and quantitative components adequately interpreted?              |                        |                   |                                                                                                                                                                                                |
|                                | 5.4. Are divergences and inconsistencies between quantitative and qualitative results adequately addressed?             |                        |                   |                                                                                                                                                                                                |
|                                | 5.5. Do the different components of the study adhere to the quality criteria of each tradition of the methods involved? |                        |                   |                                                                                                                                                                                                |
