# Supplementary material for: The Use of Professional Development to Enhance Education of Students with Autism: A Systematic Review
Source: MDPI journal article supplement (doi:10.3390/educsci13090966), 2023-09-21
Supplement: s1 [file s1]

# Supplementary material Data extraction

| Author /year                   | Country | Placement <sup>a</sup> |   | School year <sup>b</sup> |   |   | Participants <sup>c</sup> |   |   |   |   | Method <sup>d</sup> |   |    |   |    |   |   | Research focus                                                                                                                                                                                                                      | Outcome/Findings                                                                                                                                                                                                                                                                                    |
|--------------------------------|---------|------------------------|---|--------------------------|---|---|---------------------------|---|---|---|---|---------------------|---|----|---|----|---|---|-------------------------------------------------------------------------------------------------------------------------------------------------------------------------------------------------------------------------------------|-----------------------------------------------------------------------------------------------------------------------------------------------------------------------------------------------------------------------------------------------------------------------------------------------------|
|                                |         | 1                      | 2 | 1                        | 2 | 3 | 1                         | 2 | 3 | 4 | 5 | 1                   | 2 | 3  | 4 | 5  | 6 | 7 |                                                                                                                                                                                                                                     |                                                                                                                                                                                                                                                                                                     |
| (1) Able, et al. (2015)        | USA     | x                      |   | x                        | x | x |                           | x |   |   | x |                     | x |    |   |    |   |   | SEN teachers' perspectives of the social support needs of autistic students. Needs of teachers and what practice do they find successful in an inclusive classroom.<br>*Focus group                                                 | Practice and daily experiences need to guide professional preparation. A collaborative approach in PD and practice is required, including teaches, SEN teachers, and support staff.                                                                                                                 |
| (2) Asaro-Saddle & Bak, (2012) | USA     | x                      | x | x                        |   |   | x                         |   |   |   | x |                     |   | x* |   |    |   |   | Intervention directed at three students targeting planning and self-regulation strategy to use on persuasive writing followed a 2-days PD directed at teachers and support from the researcher.<br><br>*Single-subject design study | All students improved overall holistic quality, with 100% of all students engaged in the planning of their essays. Teachers reported positive attitudes to the PD. The research-based practice and the fact that they could integrate it into their practice were deemed essential for the outcome. |
| *(3) Balfe, & Ni Bhroin(2022)  | IRL     |                        | x | x                        |   |   | x                         | x | x |   |   | x                   |   |    |   | x* |   |   | Explore the effects of a PD designed as a Professional Content Knowledge (PCK)<br>*A range of data collection instruments was used.                                                                                                 | Changed interactions: adults' communications became facilitative, positive shared interaction increased, and students' communication rate increased.                                                                                                                                                |
| (5)                            | AUS     | x                      |   | x                        |   | x |                           | x | x | x |   |                     |   |    | x |    |   |   | Efficacy of a PD with content: Functional                                                                                                                                                                                           | A significant relationship was found between                                                                                                                                                                                                                                                        |

|                               |           |   |   |   |   |   |   |   |   |   |   |  |   |   |   |  |  |                                                                                                                                                                       |                                                                                                                                                                                                      |
|-------------------------------|-----------|---|---|---|---|---|---|---|---|---|---|--|---|---|---|--|--|-----------------------------------------------------------------------------------------------------------------------------------------------------------------------|------------------------------------------------------------------------------------------------------------------------------------------------------------------------------------------------------|
| Bitsika et al. (2017)         |           |   |   |   |   |   |   |   |   |   |   |  |   |   |   |  |  | Behavior Assessment. Knowledge, self-efficacy, and confidence were measured.                                                                                          | confidence, SE, and overall performance in the educators job role                                                                                                                                    |
| (6) Finlay, et al. (2022)     | IRL       |   | x | x |   |   |   | x |   |   |   |  |   |   | x |  |  | Identify the main challenges teachers experience and explore teachers' views on what professional learning they perceive as most beneficial to inform their PD needs. | Focus on PD: teachers require professional learning before teaching in the special class setting and ongoing professional learning and support.                                                      |
| (7) Ho et al. (2018)          | Hong Kong | x |   | x |   |   | x | x |   |   |   |  | x |   | x |  |  | School-based training for teachers to autistic students. The training followed phases of implementation science and used the theory of mind approach.                 | The most prominent results were based on teachers (trainees) who could apply the learned skills directly in the classroom. Some development of students' ability to recognize emotions was detected. |
| (9) Johnson et al. (2021)     | USA       | x |   | x |   |   |   | x |   |   |   |  |   | x | x |  |  | Pilot study to explore the effect of PD for working with autistic students and teachers' self-efficacy. *Quasi-experimental                                           | PD training significantly affects teachers' self-efficacy ratings based on self-reports.                                                                                                             |
| (10) Kucharczyk et al. (2015) | USA       | x |   |   |   | x | x | x | x |   | x |  | x | * |   |  |  | Explored the complex context and considerations with delivering and combining evidence-based interventions. *Focus group                                              | RQ 3- need for PD<br>Broad PD general awareness of autism and needs of students, PD specifically for GE, and prerequisites to implementation.                                                        |
| (12) Macdonald et al. (2021)  | AUS       | x |   | x | x |   |   | x |   |   |   |  | x |   | x |  |  | Exploring the experiences of regional and rural teachers who were introduced to models of practice. *Findings weighted toward interviews                              | The Early Years Model of Practice and Middle Years Model of Practice provided teachers with strategies in their classroom and empowered them.                                                        |
| (13)                          | UK        | x |   | x |   |   |   | x |   | x |   |  | X | * | x |  |  | An autism-focused Research Learning                                                                                                                                   | Participants increased their confidence in leading change                                                                                                                                            |

|                                |     |   |   |   |   |   |   |   |   |   |   |  |    |   |  |   |   |                                                                                                                                                                                                 |                                                                                                                                                                                                                         |
|--------------------------------|-----|---|---|---|---|---|---|---|---|---|---|--|----|---|--|---|---|-------------------------------------------------------------------------------------------------------------------------------------------------------------------------------------------------|-------------------------------------------------------------------------------------------------------------------------------------------------------------------------------------------------------------------------|
| Mintz (2021)                   |     |   |   |   |   |   |   |   |   |   |   |  |    |   |  |   |   | Community (RLC) was used to improve the learning and wellbeing of students.<br>*Findings weighted towards interviews.                                                                           | and used research to develop SEND policy and practice.                                                                                                                                                                  |
| (14) Probst, & Walker (2017)   | USA |   | x |   |   | x | x |   | x |   | x |  | x  |   |  | x |   | Evaluated PD (workshop and follow-up coaching) to implement the system of least prompts procedure4 and if the intervention improved the student's hygiene skills.<br>* Multiple baseline design | Student's independent performance improved. The participating classroom team found the training procedures and the system of least prompts intervention valuable and effective.                                         |
| (15) Sam et al. (2021)         | USA | x |   | x |   |   | x | x | x |   | x |  | x  | x |  |   |   | Examining the efficacy of the NPDC, a professional development model was employed to increase the use of EBP.                                                                                   | The model can be implemented in a general educational setting. The teachers' use of EBP increased. A positive impact on students' attainment of individual learning goals was identified.                               |
| (16) Strieker et al. (2012)    | USA | x | x | x | x |   | x | x | x | x | x |  |    |   |  | x | x | Explore the efficacy of a Job-Embedded Professional Development (JEPD) on inclusion of students with disabilities for three years.                                                              | The model increased students with disabilities' participation in co-taught core academic general classrooms (from self-contained classrooms).                                                                           |
| (17) Tekin-Iftar et al. (2017) | USA | x | x |   | x |   | x | x |   |   |   |  | x* |   |  |   |   | Effects of PD with coaching to train GE to use simultaneous prompting procedure.<br><br>* Multiple baseline design                                                                              | Teachers obtained the ability to use simultaneous prompting procedures, maintained the skills, and generalized them. Students gained instructive feedback stimuli added to instruction, which was maintained over time. |

|                                          |     |  |   |   |  |  |  |  |  |  |   |  |   |  |  |  |  |  |  |                                                                                                                                                                                                      |                                                                                                                                                                                           |
|------------------------------------------|-----|--|---|---|--|--|--|--|--|--|---|--|---|--|--|--|--|--|--|------------------------------------------------------------------------------------------------------------------------------------------------------------------------------------------------------|-------------------------------------------------------------------------------------------------------------------------------------------------------------------------------------------|
| (18)<br>Willia<br>ms et<br>al.<br>(2021) | USA |  | x | x |  |  |  |  |  |  | x |  | x |  |  |  |  |  |  | The perspective of special education teachers on the embedding mechanisms principals use to create comprehensive cultures and climates that are empirically linked to high observed fidelity to EBPs | PD focusing on autism (the most salient embedding mechanism): Allow staff to attend PD of their choice, PD opportunities throughout the school year & partner with experts to provide PD. |
|------------------------------------------|-----|--|---|---|--|--|--|--|--|--|---|--|---|--|--|--|--|--|--|------------------------------------------------------------------------------------------------------------------------------------------------------------------------------------------------------|-------------------------------------------------------------------------------------------------------------------------------------------------------------------------------------------|

<sup>a</sup>1=regular school, 2=special school

<sup>b</sup>1= primary school, 2=middle school, 3=secondary school

<sup>c</sup>1=students, 2=teachers, 3=para-professional, and other professionals in and around education, 4) school-leaders. 5) Special Educational Needs Coordinator (SENCO)/ Special education needs (SEN) teachers

<sup>d</sup>1=case study, 2=interview, 3=intervention, 4=questionnaire/survey, 5=mixed methods, 6= observations, 7= documents/case reports

0=Not appreciable (NA)

\*Excluded in the quality assessment
